# Supplementary material for: Incidence of adverse events in paediatric procedural sedation in the emergency department: a systematic review and meta-analysis
Source: PubMed Central journal article supplement — BMJ Open. 2016 Jun 15;6(6):e011384. doi: 10.1136/bmjopen-2016-011384 (PMC4916627; doi:10.1136/bmjopen-2016-011384), 2016-06-15
Supplement: bmjopen-2016-011384supp_appendices.pdf [file bmjopen-2016-011384supp_appendices.pdf]

## **APPENDICES**

### **Appendix 1. Description of the included and excluded studies**

Appendix 1a displays excluded studies based on publication year.

Appendix 1b shows the included studies.

### **Appendix 2. Search Strategy**

Search strategies for various databases.

**Appendix 3.** Cochrane Collaboration's tool for assessment of risk of bias in randomized controlled trials.

**Appendix 4.** Newcastle-Ottawa Scale (NOS) for assessing the quality of non-randomized studies.

**Appendix 1a.** Excluded Studies based on publication year

| Author/Year    | Country   | Design                                                           | Medication(s) Used    | No. of Patients           | No. of Sedations         | Mean (SD) Age                                                | Male (%)                           | Procedure(s)                                                                                                                                  |
|----------------|-----------|------------------------------------------------------------------|-----------------------|---------------------------|--------------------------|--------------------------------------------------------------|------------------------------------|-----------------------------------------------------------------------------------------------------------------------------------------------|
| Acworth/2001   | Australia | Single blind RCT                                                 | INM (50%);IVKM (50%)  | 52                        | 52                       | INM: 3.5 (2.0);<br>IVKM:4.6 (2.9)                            | 29 (55.8)                          | Minor Procedures: Laceration repair;<br>Foreign Body Removal                                                                                  |
| Bassett/2003   | USA       | Prospective cohort                                               | Propofol              | 392                       | 393                      | 8.0 (1-18)                                                   | 67 (17.1)                          | Fracture reduction; Joint dislocations;<br>Ocular burn examination                                                                            |
| Bates/1994     | USA       | Single-blind, RCT                                                | IN SM; IM MPC         | SM: 19; MPC:<br>23        | SM: 19; MPC: 23          | SM, m:<br>27.9±12.9; MPC:<br>28.5±11.2                       | SM:<br>12(63);MP<br>C: 17 (76)     | Sutures lacerations                                                                                                                           |
| Bauman/2002    | USA       | RCT                                                              | PF; MR                | PF: 88; MR: 87            | PF: 88; MR: 87           | NA                                                           | NA                                 | NA                                                                                                                                            |
| Billmire/1985  | USA       | Single Cohort Study                                              | F                     | 2000                      | 2000                     | NA                                                           | NA                                 | Laceration repair, orthopedic procedures                                                                                                      |
| Binder/1991    | USA       | prospective,<br>observational, non-<br>randomized clinical trial | CH                    | 42                        | 42                       | 3.017                                                        | 29 (69)                            | Wound repair, I&D, Foreign body<br>removal, etc                                                                                               |
| Connors/1994   | USA       | double-blind, double-P<br>trial                                  | M:Oral vs Nasal drops | Oral: 26; Nasal:<br>28    | Oral: 26; Nasal:<br>28   | Mean(SD);<br>Nasal:3.5(1.9);Ora<br>14.4(2.5)                 | Oral:16,<br>Nasal:11               | NA                                                                                                                                            |
| Dachs/1996     | USA       | Prospective Cohort                                               | K IV                  | 30                        | 30                       | Median, m: 38;<br>Range: 18 m-8 y                            | 21 (70)                            | Laceration repair                                                                                                                             |
| Davies/1998    | UK        | Prospective, randomized<br>double blind 2-stage<br>trial         | M Oral                | 50                        | 50                       | Median, y: 4;<br>Range, y:1-13                               | NA                                 | Laceration repair, foreign body removal,<br>burn dressing, earring removal, replacing<br>avulsed incisor, orthopedic reduction                |
| Dickinson/2001 | USA       | Retrospective<br>descriptive chart review                        | Etomidate             | 53                        | 53                       | Mean±SD, y:<br>9.7±4; Range, y:<br>2-17                      | 31 (58.5)                          | Fracture or joint reduction                                                                                                                   |
| Ellis/2004     | UK        | Prospective cohort study                                         | K IM                  | 89                        | 89                       | Range, y: 1-10                                               | 51 (57)                            | Suturing, foreign body removal, I&D,<br>excision of skin tag, dressing                                                                        |
| Frampton/2003  | Australia | Retrospective review                                             | Nitrous Oxide         | 224                       | 224                      | Range, y: 1-18                                               | 138 (61.6)                         | Wound examination, orthopedic<br>manipulation, dressing, investigative<br>procedures (IV line etc.)                                           |
| Godambe/2003   | USA       | prospective, partially<br>blind controlled<br>comparative trial  | P/F; KM               | P/F: 59;KM: 54            | P/F: 59; KM: 54          | P/F: 9.3 y<br>(3.9);KM: 9.1 y<br>(3.1);Range, y:<br>3.1-16.3 | P/F: 49<br>(83.1);KM:<br>39 (72.2) | Orthopedic procedures                                                                                                                         |
| Graff/1996     | USA       | Retrospective review                                             | FM                    | 339                       | 339                      | Mean, y: 8.4                                                 | 220 (65)                           | Fracture reduction and joint relocation                                                                                                       |
| Green/1998     | USA       | Retrospective cohort                                             | K IV                  | 156                       | 156                      | Mean: 6.3 (3.2)                                              | 108 (69)                           | Orthopedic procedures, wound and<br>dermal procedures, intubation, CT scan,<br>foreign body removal, hernia reduction,<br>lumbar puncture etc |
| Green/1998     | USA       | Retrospective cohort                                             | K IM                  | 1022                      | 1022                     | Mean, y:<br>4.5;Median, y: 3.9                               | 609 (60)                           | Orthopedic procedures, wound and<br>dermal procedures, intubation, CT scan,<br>foreign body removal, hernia reduction,<br>lumbar puncture etc |
| Hart/1997      | USA       | Randomized, controlled<br>study                                  | FIV; FM; MPC          | FIV: 20;FM: 13;<br>MPC: 9 | FIV: 20;FM:<br>13;MPC: 9 | Mean, y: 4.8<br>(range: 2-11)                                | NA                                 | Lacerations, fractures, dental procedures,<br>I&D                                                                                             |

|                |        |                                                              |                  |                               |                               |                                                               |                                       |                                                                                                                                                                            |
|----------------|--------|--------------------------------------------------------------|------------------|-------------------------------|-------------------------------|---------------------------------------------------------------|---------------------------------------|----------------------------------------------------------------------------------------------------------------------------------------------------------------------------|
| Havel/1999     | USA    | Prospective, blind, randomized, clinical trial               | Propofol, M      | Propofol: 43; M: 46           | Propofol: 43; M: 46           | Mean, y: Propofol: 9.0±3.8; M: 8.6±4.2                        | Propofol: 25 (58.1); M: 35 (76.1)     | Orthopedic reduction                                                                                                                                                       |
| Holloway/2000  | UK     | Retrospective review                                         | K                | 100                           | 105                           | Range, y: 0-12                                                | 56 (56)                               | Laceration repairs, foreign body removal, I&D, fracture manipulation, lump excision, dressing change, knee aspiration                                                      |
| Hostetler/2002 | USA    | Retrospective review                                         | KM; FM           | KM: 57; FM: 28                | KM: 57; FM: 28                | Mean(SD), m; KM: 44.9 (37.2); FM: 31.6 (25.5); Range, y: 0-18 | KM: 28 (50); FM: 17 (65.4)            | Esophageal Foreign body removal                                                                                                                                            |
| Ip/2000        | Canada | Retrospective review of prospectively gathered sedation data | K; FM; M         | K: 138; FM: 28; M: 1          | K: 138; FM: 28; M: 1          | Range: 6 m-16 y                                               | 103 (62)                              | Orthopedic procedures, wound repair, foreign body removal, ophthalmologic examination, dorsal slit of the penis, TMJ reduction, fecal impaction, rectal prolapse reduction |
| Kenegaye/2003  | USA    | Randomized, double-blind, controlled study                   | SDM; HDM         | SDM: 32; HDM: 33              | SDM: 32; HDM: 33              | Mean±SD, m: HDM 30.0 ± 11.3; SDM: 25.5 ± 10.6; Range, m: 8-47 | SDM: 22 (69); HDM: 20 (61)            | Wound repair                                                                                                                                                               |
| Kennedy/1998   | USA    | Single-blind, randomized, controlled trial                   | FM; KM           | FM: 130; KM: 130              | FM: 130; KM: 130              | Mean±SD, y: FM: 9.7±3.01; KM: 9.7±3.27; Range, y: 5-15        | FM: 94 (72); KM: 88 (68)              | Orthopedic procedures                                                                                                                                                      |
| Kim/2003       | USA    | Prospective, observational case series                       | K IV             | 20                            | 20                            | Median, y: 6.5; Range, y: 1.7-13.0                            | 8 (40)                                | Fracture reduction, Laceration, I&D, central venous access, wound exploration                                                                                              |
| Klein/2002     | USA    | Randomized, double-blind, P-controlled, clinical trial       | MF; M            | MF: 28; M: 23                 | MF: 28; M: 23                 | MF: 3.8 y; M: 3.7 y; Range: 2-8 y                             | MF: 15 (54); M: 12 (52)               | Laceration Repair                                                                                                                                                          |
| Luhmann/2001   | USA    | Randomized, 4-armed, controlled trial                        | M; N2O; MN       | M: 51; N2O: 51; MN: 52        | M: 51; N2O: 51; MN: 52        | Mean, y (SD); M: 4.2 (1.4); N2O: 4.2 (1.4); MN: 4.0 (1.4)     | M: 33 (65); N2O: 35 (69); MN: 34 (65) | Laceration repair                                                                                                                                                          |
| Luhmann/2002   | USA    | Retrospective Cohort                                         | KM; MoM; MeM; MN | KM: 36; MoM: 3; MeM: 2; MN: 1 | KM: 36; MoM: 3; MeM: 2; MN: 1 | Mean, y (SD); 11.3 (4.3)                                      | 16 (36)                               | Peritonsillar Abscess                                                                                                                                                      |
| McCarty/2000   | USA    | Prospective cohort                                           | K                | 114                           | 114                           | Mean, y (range); 5.3 (1-10.9)                                 | 64 (56.1)                             | Fracture and dislocation reduction                                                                                                                                         |
| McGlone/1998   | UK     | Prospective cohort                                           | K; M             | K: 50; M: 50                  | K: 50; M: 50                  | Median; K: 3.6 (1-7); M: 3.6 (1-7)                            | NA                                    | Suturing                                                                                                                                                                   |
| McGlone/2001   | UK     | Prospective cohort                                           | M; MF            | M: 20; MF: 20                 | M: 20; MF: 20                 | y (SD) M: 3.4 (1.7); MF: 2.9 (1.4)                            | NA                                    | Suturing                                                                                                                                                                   |
| McGlone/2004   | UK     | Prospective cohort                                           | K                | 501                           | 501                           | Mean, y: 3.6 y (median 3, mode                                | NA                                    | Wound toilet, suturing and foreign body removal                                                                                                                            |

|                |           |                                                   |                                                                             |                                                                                                                                                      |                                                                                                                                                      |                                                        |                             |                                                                                                            |
|----------------|-----------|---------------------------------------------------|-----------------------------------------------------------------------------|------------------------------------------------------------------------------------------------------------------------------------------------------|------------------------------------------------------------------------------------------------------------------------------------------------------|--------------------------------------------------------|-----------------------------|------------------------------------------------------------------------------------------------------------|
|                |           |                                                   |                                                                             |                                                                                                                                                      |                                                                                                                                                      | 2, range 0–12)                                         |                             |                                                                                                            |
| McQuillen/2000 | USA       | Prospective cohort                                | M; KM; MO; K; KMO                                                           | M: 13;KM: 44;MO: 46;K: 1;KMO: 2                                                                                                                      | M: 13;KM: 44;MO: 46;K: 1;KMO: 2                                                                                                                      | Mean, y (range):6.8 (1.2-16.6)                         | 64 (60)                     | Fracture reduction, laceration repair, I&D, LP                                                             |
| Pena/1999      | USA       | Prospective cohort                                | MFIV; MIV;MPO;INM; FIV; IMKM;IVKM; KPO; PIV; CPO; DPO; LIV; LPO; MS; MM; CH | MFIV: 391; MIV: 67; MPO: 62; INM: 3; FIV: 21; IMKM: 180; IVKM: 40; KPO: 2; PIV: 93; CPO: 122; DPO: 1; LIV: 9; LPO: 1; MS: 25; MM: 1; N2O: 168; CH: 4 | MFIV: 391; MIV: 67; MPO: 62; INM: 3; FIV: 21; IMKM: 180; IVKM: 40; KPO: 2; PIV: 93; CPO: 122; DPO: 1; LIV: 9; LPO: 1; MS: 25; MM: 1; N2O: 168; CH: 4 | Median, m: 48;Range: 1 m-21 y                          | 733^ (62)                   | Imaging, laceration repair, arthrocentesis, bone marrow aspiration, foreign body removal, hernia reduction |
| Pershad/2004   | USA       | Retrospective cohort                              | Propofol                                                                    | 52                                                                                                                                                   | 54                                                                                                                                                   | Mean (SD); 4.25 (1.86) mg/kg                           | 31 (59)                     | I&D, imaging, laceration repair, burn debridement, fracture manipulation                                   |
| Petrack/1996   | USA       | RCT                                               | K;MPC                                                                       | K: 15;MPC: 12                                                                                                                                        | K: 15;MPC: 12                                                                                                                                        | Mean, m (SD); K: 31 (20) MPC: 39 (22)                  | K: 10 (67);MPC: 10 (83)     | Suturing, wound/burn debridement and LP                                                                    |
| Pitetti/2003   | USA       | Prospective Cohort                                | MFIV; IVKM; IMKM; IV MoM; MIV; N2O; IV F and Lorazepam                      | 1215                                                                                                                                                 | 1244                                                                                                                                                 | Mean, Median (range):5.9, 6.9 (2 m-19.4 y)             | 791 (65.1%)                 | Laceration repair, fracture reduction                                                                      |
| Pohlgeers/1995 | USA       | Retrospective cohort (retrospective chart review) | IV Diazepam and IV F                                                        | 133                                                                                                                                                  | 138                                                                                                                                                  | Mean, y (SD): 8.6 (3.7); Range, y: 2-18                | 84 (63)                     | Orthopedic procedures                                                                                      |
| Priestley/2001 | Australia | Prospective cohort                                | K (IV or IM)                                                                | 28                                                                                                                                                   | 28                                                                                                                                                   | Median, y (range); IV: 4.9 (2-12); IM: 4.0 (1.5-10.0). | NA                          | Fracture reduction, I&D, splinter removal, steroid injection.                                              |
| Pruitt/1995    | USA       | Prospective cohort                                | K + M + Glycopyrrolate                                                      | 37                                                                                                                                                   | 37                                                                                                                                                   | Mean, y (range); 2.7 (1.0-7.0)                         | 23 (62)                     | Laceration repair, tooth extraction/correction                                                             |
| Qureshi/1995   | USA       | RCT                                               | K;P                                                                         | K: 15;P: 15                                                                                                                                          | K: 15;P: 15                                                                                                                                          | Mean, y (SD);K: 3.3 (2.0);P: 3.5 (2.0)                 | 14 (93)                     | Laceration repair                                                                                          |
| Schutzman/1996 | USA       | RCT                                               | OTFC; MPC                                                                   | OTFC: 20; MPC: 19                                                                                                                                    | OTFC: 20; MPC: 19                                                                                                                                    | Mean, y (SD); OTFC: 4.8 (1.4); MPC: 4.6 (0.9)          | OTFC: 13 (65); MPC: 12 (63) | Laceration repair                                                                                          |
| Shane/1994     | USA       | RCT                                               | M, Rectal; P                                                                | M: 16; P: 18                                                                                                                                         | M: 16; P: 18                                                                                                                                         | Mean, m (SD); M: 25.5 (9.3); P: 27.2 (10.8)            | M: 10 (63); P: 12 (67)      | Laceration repair                                                                                          |
| Sherwin/2000   | USA       | RCT                                               | K; KM                                                                       | K: 51; KM: 53                                                                                                                                        | K: 51; KM: 53                                                                                                                                        | Median, y (IQR); KM: 7.3 (4.1-10.9); K: 6.1 (2.2-10.7) | K: 30 (59); KM: 40 (75)     | NA                                                                                                         |
| Skokan/2001    | USA       | Prospective cohort                                | Propofol + Opioid                                                           | 40                                                                                                                                                   | 40                                                                                                                                                   | Mean, y: 7.4                                           | 26(65)                      | Hernia reduction, laceration repair, etc                                                                   |

|               |           |                      |                                                     |                |                |                                                      |                            |                                                                                                   |
|---------------|-----------|----------------------|-----------------------------------------------------|----------------|----------------|------------------------------------------------------|----------------------------|---------------------------------------------------------------------------------------------------|
| Terndrup/1991 | USA       | Prospective cohort   | IM Meperidine + IM Promethazine + IM Chlorpromazine | 63             | 63             | Mean, y, (SD) range: 3.6 (2.0), 1-9                  | 40 (63)                    | Laceration repair, fracture reduction, foreign body removal, joint aspiration, I&D                |
| Terndrup/1993 | USA       | RCT                  | MPC; MP                                             | MPC: 44;MP: 43 | MPC: 44;MP: 43 | Mean, y (SD):MPC: 4.0 (2.2);MP: 4.4 (2.5)            | MPC: (64);MP: (72)         | Laceration repair, fracture reduction                                                             |
| Theroux/1993  | USA       | RCT                  | M                                                   | 27             | 27             | Median, m; M: 34.2                                   | NA                         | Laceration repair                                                                                 |
| Treston/2004  | Australia | Prospective cohort   | K                                                   | 272            | 272            | Range, y: 1-12                                       | 173 (64)                   | Laceration repair, fracture reduction, plaster change, foreign body removal, dressing change, I&D |
| Wathen/2000   | USA       | RCT                  | KM;K                                                | KM: 137;K: 129 | KM: 137;K: 129 | Median, y (IQR):KM: 5.6 (3.4-9.6);K: 6.8 (4.4-10.3). | KM: 76 (55.5);K: 73 (56.6) | Fractures, Lacerations, other                                                                     |
| Yealy/1992    | USA       | Retrospective cohort | M                                                   | 38             | 38             | Mean, m (SD): 32 (9)                                 | NA                         | Laceration repair                                                                                 |
| Younge/2001   | UK        | RCT                  | M; K                                                | M: 28; K: 29   | M: 28; K: 29   | Mean, y; M: 4.1; K: 4.1                              | M: 15 (54); K: 15 (52)     | Wound repair                                                                                      |

Abbreviations: CH, Chloral Hydrate; CPO, Chloral Hydrate Oral; CT, Computed Tomography; DPO, Diazepam Oral; F, Fentanyl; FIV, Fentanyl Intravenous; FM, Fentanyl + Midazolam; HDM, High Dose Rectal Midazolam; I&D, incision and drainage; IM, Intramuscular; IMKM, Ketamine + Midazolam; INM, Intranasal Midazolam; IV, Intravenous; IVKM, Intravenous Ketamine + Midazolam; K, Ketamine; kg, kilogram; KM, Ketamine + Midazolam; KMO, Ketamine + Midazolam + Opiate; KPO, Ketamine Oral; LIV, Lorazepam Intravenous; LP, lumbar puncture; LPO, Lorazepam Oral; M, Midazolam; m, months; MeM, Meperidine and Midazolam, MF, Midazolam/Flumazenil; MFIV, Intravenous Midazolam + Fentanyl; MIV, Midazolam Intravenous; mg, milligram; MM, Morphine + Midazolam; MN, Midazolam + N2O; MO, Midazolam + Opiate; MoM, Morphine and Midazolam; MP, Meperidine + Promethazine; MPC, Meperidine + Promethazine + Chlorpromazine; MPO, Midazolam Oral; MR, Methohexital + Remifentanyl; MS, Midazolam + Sufentanyl; P/F, Propofol/Fentanyl; PIV, Phentobarbital Intravenous; OTFC, Oral Transmucosal Fentanyl Citrate; P, Placebo; RCT, Randomized Controlled Trial; SDM, Standard Dose Rectal Midazolam; SM, Sufentanyl + Midazolam; TMJ, Temporomandibular Joint; y, years

**Appendix 1b. Included studies**

| Author/Year     | Country   | Design                              | Medication/s Used            | No. of Patients                        | No. of Sedations                       | Median/Mean Age                                                                               | Male (%)                              | Procedure/s                                                                                                                                                         |
|-----------------|-----------|-------------------------------------|------------------------------|----------------------------------------|----------------------------------------|-----------------------------------------------------------------------------------------------|---------------------------------------|---------------------------------------------------------------------------------------------------------------------------------------------------------------------|
| Anderson/2007   | USA       | Prospective cohort                  | Propofol                     | 125                                    | NA                                     | Median: 8 (2-17)                                                                              | 81 (65)                               | Orthopedic Reduction                                                                                                                                                |
| Andolfatto/2010 | Canada    | Prospective cohort                  | K + Propofol                 | 219                                    | 219                                    | Median: 13; Range: 1-20; IQR: 8-16                                                            | 159 (73)                              | Orthopedic Reduction, Laceration, Chest tube, I&D, Foreign Body Removal, Hernia Repair, Lumbar Puncture, Cardioversion, Laryngoscopy, Pelvic examination            |
| Asadi/2013      | Iran      | Prospective Double-Blind RCT        | K + Atropine; K + P          | 200                                    | 200                                    | Intervention arm, y: Mean(SD): 7.0 (3.6); Control arm, y: Mean(SD): 7.1 (3.7); Range, y: 3-16 | 137 (68.5)                            | Fracture, Reduction, Wound Management                                                                                                                               |
| Babl/2010       | Australia | Retrospective chart review          | Nitrous Oxide; K; M          | 2002                                   | 2002                                   | Median: 5.7                                                                                   | 1192 (59.5)                           | Laceration repair, Orthopedic procedures, foreign body removal, vascular access, etc                                                                                |
| Babl/2008       | Australia | Prospective Observational Study     | Nitrous Oxide                | 124                                    | 131                                    | Mean: 8.1, (1.3–17.9); Median: 8.3 (4.9–11.0)                                                 | 80 (64.5)                             | Laceration repair, Orthopedic procedures, IV line access, abscess                                                                                                   |
| Barkan/2013     | Israel    | RCT                                 | KM; M                        | 60                                     | 60                                     | Mean; KM: 4.76±2.29; M: 5.26±2.26                                                             | KM: 17(54); M: 15(51)                 | Laceration repair                                                                                                                                                   |
| Bar-Meir/2006   | Israel    | Prospective cohort                  | Nitrous Oxide                | 45                                     | 45                                     | Mean: 4.3 (3); Range: 1-16                                                                    | 30 (67)                               | Facial laceration repair                                                                                                                                            |
| Bleilberg/2007  | USA       | Retrospective review                | K                            | 72                                     | 72                                     | Median, y: 6.1; Range: 10m-14y                                                                | NA                                    | Fracture reduction, Laceration repair, I&D, foreign body removal, fingertip amputation repair, inguinal hernia reduction, paraphymosis reduction and arthrocentesis |
| Chong/2013      | Singapore | Retrospective study                 | K + Atropine; K w/o Atropine | K + Atropine: 164; K w/o Atropine: 119 | K + Atropine: 164; K w/o Atropine: 119 | Mean; K + Atropine: 5.3 (4.74 to 5.81); K w/o Atropine: 5.5 (4.77 to 6.16)                    | K + Atropine: 101; K w/o Atropine: 83 | Laceration repair, Manipularion and reduction, foreign body removal, I&D                                                                                            |
| Chun/2009       | USA       | Retrospective cohort study          | MTX; PTB                     | MTX: 21, PTB: 42                       | MTX: 21, PTB: 42                       | Mean (SD), y; MTX: 20.0 (4.9); PTB: 28.8 (4.9)                                                | MTX: 13; PTB: 26                      | Head CT                                                                                                                                                             |
| Cudny/2013      | USA       | Prospective observational           | K IV vs IM                   | IV: 91; IM: 49                         | IV: 91; IM: 49                         | NA                                                                                            | NA                                    | Fracture reduction, Laceration/suture, I&D, Lumber puncture, sedation for radiology, foreign body removal.                                                          |
| Di Liddo/2006   | Canada    | Randomized, double-blind trial      | E; M                         | E: 50; M: 50                           | E: 50; M: 50                           | Mean; E: 108±45.6 m; M: 100±42.7                                                              | E: 25(50); M: 25(50)                  | Fracture Reduction                                                                                                                                                  |
| Dilli/2008      | Turkey    | Randomized controlled study         | IVKM; K IV                   | IVKM: 48; K IV: 51                     | IVKM: 48; K IV: 51                     | Mean±SD: IVKM: 7.1±3.9; K IV: 6.0±3.5                                                         | IVKM: 27 (56.3); K IV: 32 (62.7)      | Lumbar Puncture                                                                                                                                                     |
| Ghane/2012      | Iran      | Interventional non randomized trial | M                            | 30                                     | 30                                     | 5.50±2.70 y                                                                                   | 14 (46.7)                             | Imaging CT scan                                                                                                                                                     |

|                  |         |                                                           |                                                                                                    |                                                |                                                |                                                                                    |                                                                                  |                                                                                                                                                         |
|------------------|---------|-----------------------------------------------------------|----------------------------------------------------------------------------------------------------|------------------------------------------------|------------------------------------------------|------------------------------------------------------------------------------------|----------------------------------------------------------------------------------|---------------------------------------------------------------------------------------------------------------------------------------------------------|
| Heinrich/2014    | Germany | Record review                                             | Nitrous Oxide (50:50)                                                                              | 207                                            | 207                                            | Mean, y: 9.0; Range, y: 2.7-16.5                                                   | NA                                                                               | Orthopedic reduction, laceration closure, Iv cannulation, Abscess drainage, needle puncture, foreign body removal.                                      |
| Jasiak/2012      | USA     | Retrospective cohort study                                | Prpofol IV                                                                                         | 88                                             | 88                                             | Mean±SD, y: 10.8±4.5; Range, y:1-18                                                | 66 (75)                                                                          | Fracture/Dislocation manipulation, imaging, LP, eye examination, laceration repair                                                                      |
| Jiminez/2012     | Spain   | Retrospective observational study                         | F + N2O (FN2O); N2O                                                                                | F + N2O: 64; N2O: 17                           | F + N2O: 64; N2O: 17                           | Range, y: 4-15                                                                     | F + N2O: 46 (71.9); N2O: 12 (70.6)                                               | Fracture reduction (radial, ulnar)                                                                                                                      |
| Khutia/2012      | India   | Prospective, randomized trial                             | Propofol + K; Propofol + F                                                                         | Propofol + K: 48; Propofol + F: 44             | Propofol + K: 48; Propofol + F: 44             | Range, y: 3-14                                                                     | NA                                                                               | Fracture dislocation, I&D, dressing-debridement of wounds                                                                                               |
| Klein/2011       | USA     | Randomized clinical trial                                 | M: Oral ; IN, Buccal                                                                               | Oral: 59; IN: 59; Buccal: 59                   | Oral: 59; IN: 59; Buccal: 59                   | Median (range), y; Oral: 2.7 (1.2–6.7); IN: 2.9 (1.2–7.0); Buccal: 3.8 (1.1–6.1)   | Oral: 33 (56); IN: 40 (68); Buccal: 40 (68)                                      | Laceration Repair                                                                                                                                       |
| Koo/2013         | Korea   | Retrospective review of medical records                   | CH: 48±2 mg/kg (1); 55±2 mg/kg (2); 66±3 mg/kg (3); 76±3 mg/kg (4); 85±3 mg/kg (5); 97±4 mg/kg (6) | 1: 115; 2: 116; 3: 122; 4: 202; 5: 179; 6: 100 | 1: 115; 2: 116; 3: 122; 4: 202; 5: 179; 6: 100 | m; 1: 28±13.9; 2: 28±15.8; 3: 29±14.4; 4: 30±12.1; 5: 32±15.0; 6: 31±13.6          | 1: 75 (65.2); 2: 80 (69); 3: 80 (65.6); 4: 136 (67.3); 5: 116 (64.8); 6: 66 (66) | Facial laceration repair                                                                                                                                |
| Kye/2012         | Korea   | Prospective, randomized, double-blind, P-controlled trial | K + Atropine; K                                                                                    | K + Atropine: 68; K: 72                        | K + Atropine: 68; K: 72                        | y, K + Atropine: 2.9±1.5; K: 2.6±1.3                                               | K + Atropine: 48; K: 49                                                          | Laceration repair                                                                                                                                       |
| Lane/2008        | USA     | Retrospective chart review                                | M                                                                                                  | 205                                            | 205                                            | Mean±SD, m: 31.3±13.2; Range, m: 1.5-60                                            | 121 (59)                                                                         | Laceration repair, I&D, nail bed repair or removal, dental procedure, hernia reduction, imaging, g-tube replacement, LP, eye irrigation, arthrocentesis |
| Langhan/2011     | USA     | RCT                                                       | K                                                                                                  | 58                                             | 58                                             | Median, y: 5; Range, y: 1-19                                                       | 43 (74)                                                                          | Fracture reduction, laceration repair, I&D, arthrocentesis                                                                                              |
| Lee/2012         | Korea   | Prospective randomized study                              | N2O (50%-70%); K                                                                                   | N2O: 18; K: 14                                 | N2O: 18; K: 14                                 | Mean±SD, y; N2O: 5.9±1.8; K: 4.7±1.6; Range, y: 3-10                               | N2O: 14 (77.8); K: 12 (85.7)                                                     | Laceration repair                                                                                                                                       |
| Lee-Jayaram/2010 | USA     | Prospective, RCT                                          | KM; E + F                                                                                          | KM: 11; E + F: 12                              | KM: 11; E + F: 12                              | Mean(SD), Median: KM: 9.64 (2.9), 10.0; E + F: 8.5 (2.6), 8.0                      | KM: 7 (64); E + F: 11 (92)                                                       | Fracture reduction                                                                                                                                      |
| Lin/2010         | Taiwan  | Retrospective observational study                         | Thiamylal: 5 mg/kg (1); 5 mg/kg+2.5 mg/kg (2); 5 mg/kg+ 5 mg/kg (3)                                | 1: 146; 2: 54; 3: 27                           | 1: 146; 2O: 54; 3: 27                          | y, 1: 3.87±1.34; 2: 4.37±1.77; 3: 4.41±1.55; Range, y: 2-7                         | 1: 64 (43.8); 2: 31 (57.4); 3: 10 (37.0)                                         | Laceration repair                                                                                                                                       |
| Losek/2006       | USA     | Retrospective cohort                                      | KM; MoM + K; MeM + K                                                                               | KM: 33; MoM + K: 32; MeM + K: 15               | KM: 33; MoM + K: 32; MeM + K: 15               | Mean, m (SD); Total: 91.8 (47.2); KM: 79 (46); MoM + K: 108 (47); MeM + K: 85 (44) | KM: 16 (48); MoM + K: 24 (75); MeM + K: 7 (47)                                   | Fracture/joint dislocation reduction, foreign body removal, I&D, vaginal examination, CT scan, hernia reduction                                         |

|               |           |                      |                                                    |                           |                           |                                                                 |                                   |                                                                                    |
|---------------|-----------|----------------------|----------------------------------------------------|---------------------------|---------------------------|-----------------------------------------------------------------|-----------------------------------|------------------------------------------------------------------------------------|
| Luhmann/2006  | USA       | RCT                  | KM; N2OHB                                          | KM: 47; N2OHB: 55         | KM: 47; N2OHB: 55         | Mean, y (95%CI); KM: 9.4 (8.5 to 10.2); N2OHB: 8.7 (7.9 to 9.4) | KM: 32 (58); N2OHB: 29 (62)       | Middle to distal forearm fracture reduction.                                       |
| Mandt/2012    | USA       | Prospective cohort   | F + E: 0.1 mg/kg (1); 0.2 mg/kg (2); 0.3 mg/kg (3) | 1: 4; 2: 40; 3: 16        | 1: 4; 2: 40; 3: 16        | NA                                                              | 38 (63.3)                         | Fracture/Joint reduction, I&D, Arthrocentesis                                      |
| McKee/2008    | USA       | Retrospective cohort | K; Oral Analgesia + K                              | K: 270; OAK: 201          | K: 270; OAK: 201          | Mean, y (SD); K: 8.5 (3.9); OAK: 8.2 (3.6)                      | K: 192 (71); OAK: 124 (62)        | Fracture reduction                                                                 |
| McQueen/2009  | USA       | Prospective cohort   | FM; KM; K                                          | FM: 108; KM: 123; K: 422  | FM: 108; KM: 123; K: 422  | Mean, y (SD) all patients: 7.5 (4.5)                            | 341 (62%)                         | Fracture reduction, laceration repair.                                             |
| Melendez/2009 | USA       | Case-control study   | K                                                  | 4252                      | 4252                      | NA                                                              | NA                                | Fracture reduction, laceration repair, I&D, Arthrocentesis, LP, bone marrow biopsy |
| Misra/2008    | USA       | Retrospective cohort | K; M                                               | 173                       | 173                       | 1-2 y; 73% (126/173)                                            | 94 (54.3)                         | I&D, laceration repair                                                             |
| Oktay/2005    | Turkey    | Prospective cohort   | K; KM                                              | K: 91; KM: 50             | K: 91; KM: 50             | Mean-median (SD), y; 4.52 - 4 (2.60)                            | 78^ (55.3)                        | Fracture/dislocation reduction, imaging and gynecological examination              |
| Roback/2006   | USA       | RCT                  | K: IV vs IM                                        | IV: 109; IM: 99           | IV: 109; IM: 99           | Median (range), y; IV: 8.1 (1.2-15.8); IM: 7.0 (1.9-15.5)       | IV: 71 (65.1); IM: 63 (63)        | Orthopedic procedures                                                              |
| Seith/2012    | Australia | Prospective cohort   | N2O + IN F                                         | 41                        | 41                        | Mean (SD), y: 6.7 (2.9); Median (IQR), y: 6.3 (5.2-8.8)         | 29 (70.7)                         | Orthopedic procedures, laceration repair, I&D, foreign body removal, burn dressing |
| Shah/2011     | Canada    | RCT                  | K; K + Propofol                                    | K: 69; K + Propofol: 67   | K: 69; K + Propofol: 67   | Median, y (IQR); K: 11 (7-13); K + Propofol: 11 (7-14)          | K: 46 (69); K + Propofol: 50 (72) | Orthopedic procedures                                                              |
| Sharieff/2007 | USA       | Prospective cohort   | K + Propofol                                       | 20                        | 20                        | Mean, y (SD); 9.6 (3.4)                                         | 16 (80)                           | Fracture Reduction                                                                 |
| Street/2014   | USA       | Prospective cohort   | K                                                  | 43                        | 43                        | Mean, y (SD); 13.9 (1.5)                                        | 35 (81)                           | Fracture reduction, abscess drainage, chest tube placement                         |
| Treston/2009  | Australia | Prospective cohort   | K: IM vs IV                                        | IM: 54; IV: 691           | IM: 54; IV: 691           | Mean, y (range); 5.5 (1-14)                                     | NA                                | Laceration repair, fracture reduction, foreign body removal, I&D, imaging.         |
| Waterman/2006 | USA       | Retrospective cohort | K; K + Morphine                                    | K: 454; K + Morphine: 857 | K: 454; K + Morphine: 857 | Mean, y: K: 7; K + Morphine: 8.6                                | NA                                | Dislocation reductions, I&D, laceration repair                                     |
| Wells/2012    | USA       | Retrospective cohort | Propofol                                           | 331                       | 331                       | NA                                                              | 218 (66)                          | Fracture and laceration repair                                                     |

Abbreviations: CH, Chloral Hydrate; CI, Confidence Interval; CT, Computed Tomography; E, Etomidate; F, Fentanyl; FIV, Fentanyl Intravenous; FM, Fentanyl + Midazolam; HDM, High Dose Rectal Midazolam; I&D, Incision and Drainage; IM, Intramuscular; IMKM, Ketamine + Midazolam; IN, Intranasal; INM, Intranasal Midazolam; IV, Intravenous; IVKM, Intravenous Ketamine + Midazolam; K, Ketamine; kg, kilogram; KM, Ketamine + Midazolam; LIV, Lorazepam Intravenous; LP, Lumbar Puncture; M, Midazolam; m, months; MeM, Meperidine and Midazolam, MF, Midazolam/Flumazenil; MFIV, Intravenous Midazolam + Fentanyl; MIV, Midazolam Intravenous; mg, milligram; MM, Morphine + Midazolam; MN, Midazolam + N2O; MoM, Morphine and Midazolam; MP, Meperidine + Promethazine; MPC, Meperidine + Promethazine + Chlorpromazine; MR, Methohexital + Remifentanyl; MS, Midazolam + Sufentanil; MTX, Methotrexate; N2OHB, Inhaled N2O and Hematoma Block; OAK, Oral Analgesia + Ketamine; P/F, Propofol/Fentanyl; PIV, Phentobarbital Intravenous; PTB, Pentobarbital; OTFC, Oral Transmucosal Fentanyl Citrate; P, Placebo; RCT, Randomized Controlled Trial; SDM, Standard Dose Rectal Midazolam; SM, Sufentanil + Midazolam; TMJ, Temporomandibular Joint; y, years



**Appendix 2. Search Strategy**

|                                                                 | Search Number | Topic                                                                                                                                                                                                                                                                            | Limiters/Expanders                                                                         | Results | Search Type |
|-----------------------------------------------------------------|---------------|----------------------------------------------------------------------------------------------------------------------------------------------------------------------------------------------------------------------------------------------------------------------------------|--------------------------------------------------------------------------------------------|---------|-------------|
| <b>Ovid MEDLINE® in process and other non-indexed citations</b> |               |                                                                                                                                                                                                                                                                                  |                                                                                            |         |             |
|                                                                 | 1             | ((conscious or dissociative) adj3 sedat*).mp. [mp=title, abstract, original title, name of substance word, subject heading word, keyword heading word, protocol supplementary concept word, rare disease supplementary concept word, unique identifier]                          |                                                                                            |         |             |
|                                                                 | 2             | Conscious Sedation/ or exp "Hypnotics and Sedatives"/                                                                                                                                                                                                                            |                                                                                            |         |             |
|                                                                 | 3             | 1 or 2                                                                                                                                                                                                                                                                           |                                                                                            |         |             |
|                                                                 | 4             | emergen*.mp. or exp emergency medical services/ or emergency medicine/ [mp=title, abstract, original title, name of substance word, subject heading word, keyword heading word, protocol supplementary concept word, rare disease supplementary concept word, unique identifier] |                                                                                            |         |             |
|                                                                 | 5             | 3 and 4                                                                                                                                                                                                                                                                          |                                                                                            |         |             |
|                                                                 | 6             | (procedur* adj3 sedat*).mp. [mp=title, abstract, original title, name of substance word, subject heading word, keyword heading word, protocol supplementary concept word, rare disease supplementary concept word, unique identifier]                                            |                                                                                            |         |             |
|                                                                 | 7             | 4 and 6                                                                                                                                                                                                                                                                          |                                                                                            |         |             |
| <b>EMBASE</b>                                                   |               |                                                                                                                                                                                                                                                                                  |                                                                                            |         |             |
|                                                                 | 1             | ((conscious or procedural or dissociative) adj3 sedat*).mp. [mp=title, abstract, subject headings, heading word, drug trade name, original title, device manufacturer, drug manufacturer, device trade name, keyword]                                                            |                                                                                            |         |             |
|                                                                 | 2             | conscious sedation/                                                                                                                                                                                                                                                              |                                                                                            |         |             |
|                                                                 | 3             | emergency patient/ or emergency care/ or emergency nurse practitioner/ or emergency surgery/ or emergency treatment/ or emergency medicine/ or emergency/ or emergency nursing/ or emergency ward/ or emergency health service/                                                  |                                                                                            |         |             |
|                                                                 | 4             | (1 or 2) and (3 or trauma*.mp.) [mp=title, abstract, subject headings, heading word, drug trade name, original title, device manufacturer, drug manufacturer, device trade name, keyword]                                                                                        |                                                                                            |         |             |
| <b>WEB of SCIENCE</b>                                           |               |                                                                                                                                                                                                                                                                                  |                                                                                            |         |             |
|                                                                 | 1             | TOPIC: ((conscious OR procedural OR dissociative OR moderate) SAME sedat*) AND TOPIC: (emergen* OR trauma*)<br>Indexes: SCI-EXPANDED                                                                                                                                             |                                                                                            |         |             |
| <b>SCOPUS</b>                                                   |               |                                                                                                                                                                                                                                                                                  |                                                                                            |         |             |
|                                                                 |               | TITLE-ABS-KEY(((conscious OR procedural OR dissociative OR moderate) W/3 sedat*) AND (emergen* OR trauma*)) 109                                                                                                                                                                  |                                                                                            |         |             |
| <b>CINAHL</b>                                                   |               |                                                                                                                                                                                                                                                                                  |                                                                                            |         |             |
|                                                                 | S5            | S1 AND S4                                                                                                                                                                                                                                                                        | Limiters - Published Date: 20130101-20141231; Peer Reviewed; Search modes - Boolean/Phrase | 48      |             |

|                       |    |                                                                                                                                                                                                                                                                                                                                                                             |                               |         |          |
|-----------------------|----|-----------------------------------------------------------------------------------------------------------------------------------------------------------------------------------------------------------------------------------------------------------------------------------------------------------------------------------------------------------------------------|-------------------------------|---------|----------|
|                       | S4 | S2 OR S3                                                                                                                                                                                                                                                                                                                                                                    | Search modes - Boolean/Phrase | 42,433  |          |
|                       | S3 | (MH "Trauma+") OR (MH "Emergency Patients") OR (MH "Trauma Centers") OR (MH "Trauma Nursing")                                                                                                                                                                                                                                                                               | Search modes - Boolean/Phrase | 15,870  |          |
|                       | S2 | (MH "Emergency Service+") OR (MH "Emergency Medicine") OR (MH "Emergency Nurse Practitioners") OR (MH "Emergency Medical Technician Attitudes") OR (MH "Physicians, Emergency")                                                                                                                                                                                             | Search modes - Boolean/Phrase | 31,563  |          |
|                       | S1 | (MH "Conscious Sedation"# OR #MH "Hypnotics and Sedatives+"#                                                                                                                                                                                                                                                                                                                | Search modes - Boolean/Phrase | 8,029   |          |
| <b>Ovid MEDLINE®†</b> |    |                                                                                                                                                                                                                                                                                                                                                                             |                               |         |          |
|                       | 1  | emergen*.mp. or exp emergency medical services/ or emergency medicine/ [mp=title, abstract, original title, name of substance word, subject heading word, keyword heading word, protocol supplementary concept word, rare disease supplementary concept word, unique identifier]                                                                                            |                               | 313,001 | Advanced |
|                       | 2  | conscious sedation/ or ((conscious or moderate or dissociative) adj3 sedat*).mp. [mp=title, abstract, original title, name of substance word, subject heading word, keyword heading word, protocol supplementary concept word, rare disease supplementary concept word, unique identifier]                                                                                  |                               | 8,068   | Advanced |
|                       | 3  | (procedur* adj3 sedation).mp. [mp=title, abstract, original title, name of substance word, subject heading word, keyword heading word, protocol supplementary concept word, rare disease supplementary concept word, unique identifier]                                                                                                                                     |                               | 1,373   | Advanced |
|                       | 4  | (propofol or etomidate or versed or fentanyl or ketamine or midazolam or methohexital or dexmedetomidine or remifentanyl or pentobarbital or "nitrous oxide").mp. [mp=title, abstract, original title, name of substance word, subject heading word, keyword heading word, protocol supplementary concept word, rare disease supplementary concept word, unique identifier] |                               | 70,089  | Advanced |
|                       | 5  | 1 and (2 or 3 or 4)                                                                                                                                                                                                                                                                                                                                                         |                               | 3,550   | Advanced |
|                       | 6  | limit 5 to ("newborn infant (birth to 1 month)" or "infant (1 to 23 months)" or "preschool child (2 to 5 years)" or "child (6 to 12 years)" or "adolescent (13 to 18 years)")                                                                                                                                                                                               |                               | 1,335   | Advanced |
|                       | 7  | conscious sedation/ae or (propofol/ae or etomidate/ae or versed/ae or fentanyl/ae or ketamine/ae or midazolam/ae or methohexital/ae or dexmedetomidine/ae or remifentanyl/ae or pentobarbital/ae or "nitrous oxide"/ae)                                                                                                                                                     |                               | 7,736   | Advanced |
|                       | 8  | 6 and 7                                                                                                                                                                                                                                                                                                                                                                     |                               | 319     | Advanced |
|                       | 9  | 6 and ci.fs.                                                                                                                                                                                                                                                                                                                                                                |                               | 163     | Advanced |
|                       | 10 | 8 or 9                                                                                                                                                                                                                                                                                                                                                                      |                               | 377     | Advanced |
|                       | 11 | 5 and (child* or pediater* or paediatric* or boy* or girl* or preschool* or school*).mp. [mp=title, abstract, original title, name of substance word, subject heading word, keyword heading word, protocol supplementary concept word, rare disease supplementary concept word, unique identifier]                                                                          |                               | 1,196   | Advanced |
|                       | 12 | 11 and (7 or ci.fs.)                                                                                                                                                                                                                                                                                                                                                        |                               | 314     | Advanced |
|                       | 13 | 10 or 12                                                                                                                                                                                                                                                                                                                                                                    |                               | 393     | Advanced |
|                       | 14 | remove duplicates from 13                                                                                                                                                                                                                                                                                                                                                   |                               | 387     |          |
| <b>Cochrane*</b>      |    |                                                                                                                                                                                                                                                                                                                                                                             |                               |         |          |
|                       | 1  | emergen*.mp. or exp emergency medical services/ or emergency medicine/ [mp=title, abstract, subject headings, heading word, drug trade name, original title, device manufacturer, drug manufacturer, device trade name, keyword]                                                                                                                                            |                               | 359,289 | Advanced |
|                       | 2  | conscious sedation/ or ((conscious or moderate or dissociative) adj3 sedat*).mp. [mp=title, abstract, subject headings, heading word, drug trade name, original title, device manufacturer, drug manufacturer, device trade name, keyword]                                                                                                                                  |                               | 5,990   | Advanced |

|                       |    |                                                                                                                                                                                                                                                                                                                                                                                                                                                                                                                                                                                                                                                             |  |         |          |
|-----------------------|----|-------------------------------------------------------------------------------------------------------------------------------------------------------------------------------------------------------------------------------------------------------------------------------------------------------------------------------------------------------------------------------------------------------------------------------------------------------------------------------------------------------------------------------------------------------------------------------------------------------------------------------------------------------------|--|---------|----------|
|                       | 3  | (procedur* adj3 sedation).mp. [mp=title, abstract, subject headings, heading word, drug trade name, original title, device manufacturer, drug manufacturer, device trade name, keyword]                                                                                                                                                                                                                                                                                                                                                                                                                                                                     |  | 2,978   | Advanced |
|                       | 4  | (propofol or etomidate or versed or fentanyl or ketamine or midazolam or methohexital or dexmedetomidine or remifentanyl or pentobarbital or "nitrous oxide").mp. [mp=title, abstract, subject headings, heading word, drug trade name, original title, device manufacturer, drug manufacturer, device trade name, keyword]                                                                                                                                                                                                                                                                                                                                 |  | 118,093 | Advanced |
|                       | 5  | emergency ward/                                                                                                                                                                                                                                                                                                                                                                                                                                                                                                                                                                                                                                             |  | 60,820  | Advanced |
|                       | 6  | 1 or 5                                                                                                                                                                                                                                                                                                                                                                                                                                                                                                                                                                                                                                                      |  | 359,289 | Advanced |
|                       | 7  | conscious sedation/                                                                                                                                                                                                                                                                                                                                                                                                                                                                                                                                                                                                                                         |  | 4,105   | Advanced |
|                       | 8  | 2 or 3 or (7 and 4)                                                                                                                                                                                                                                                                                                                                                                                                                                                                                                                                                                                                                                         |  | 8,348   | Advanced |
|                       | 9  | 6 and 8                                                                                                                                                                                                                                                                                                                                                                                                                                                                                                                                                                                                                                                     |  | 1,020   | Advanced |
|                       | 10 | exp adverse drug reaction/                                                                                                                                                                                                                                                                                                                                                                                                                                                                                                                                                                                                                                  |  | 232,623 | Advanced |
|                       | 11 | conscious sedation/ae or (propofol/ae or etomidate/ae or versed/ae or fentanyl/ae or ketamine/ae or midazolam/ae or methohexital/ae or dexmedetomidine/ae or remifentanyl/ae or pentobarbital/ae or "nitrous oxide"/ae)                                                                                                                                                                                                                                                                                                                                                                                                                                     |  | 14,223  | Advanced |
|                       | 12 | 9 and (10 or 11)                                                                                                                                                                                                                                                                                                                                                                                                                                                                                                                                                                                                                                            |  | 293     | Advanced |
|                       | 13 | limit 9 to (infant <to one year> or child <unspecified age> or preschool child <1 to 6 years> or school child <7 to 12 years> or adolescent <13 to 17 years>)                                                                                                                                                                                                                                                                                                                                                                                                                                                                                               |  | 346     | Advanced |
|                       | 14 | 12 and (child* or infant* or preschool* or pediatr* or paediatr* or teen* or adolescen*).mp. [mp=title, abstract, subject headings, heading word, drug trade name, original title, device manufacturer, drug manufacturer, device trade name, keyword]                                                                                                                                                                                                                                                                                                                                                                                                      |  | 166     | Advanced |
|                       | 15 | 13 or 14                                                                                                                                                                                                                                                                                                                                                                                                                                                                                                                                                                                                                                                    |  | 386     | Advanced |
|                       | 16 | 15 not case report/                                                                                                                                                                                                                                                                                                                                                                                                                                                                                                                                                                                                                                         |  | 362     |          |
| <b>WEB of SCIENCE</b> |    |                                                                                                                                                                                                                                                                                                                                                                                                                                                                                                                                                                                                                                                             |  |         |          |
|                       |    | TOPIC: (((procedur* OR moderate OR conscious OR dissociative OR propofol OR etomidate OR versed OR fentanyl OR ketamine OR midazolam OR methohexital OR dexmedetomidine OR remifentanyl OR pentobarbital OR "nitrous oxide") SAME sedat*) AND emergency) AND TOPIC: (pediatr* OR paediatr* OR child* OR infant* OR adolescen* OR preteen* OR teen*) AND TOPIC: (adverse OR Death* OR mortal* OR fatal* OR "life threatening" OR intub* OR ventilat* OR nausea* OR emesis OR aspirat* OR vomit* OR hypoxi* OR bradycard* OR hypotens* OR myoclon* OR laryngospas* OR intraocular OR letharg* OR headache OR sleep OR apne* OR apnoe* OR hallucinat*) 421     |  |         |          |
| <b>SCOPUS</b>         |    |                                                                                                                                                                                                                                                                                                                                                                                                                                                                                                                                                                                                                                                             |  |         |          |
|                       |    | (TITLE-ABS-KEY(((procedur* OR moderate OR conscious OR dissociative OR propofol OR etomidate OR versed OR fentanyl OR ketamine OR midazolam OR methohexital OR dexmedetomidine OR remifentanyl OR pentobarbital OR "nitrous oxide") W/5 sedat*) AND TITLE-ABS-KEY(emergency AND (pediatr* OR paediatr* OR infant* OR preschool* OR adolescen* OR child* OR teen*))) AND TITLE-ABS-KEY((adverse OR death* OR mortal* OR fatal* OR "life threatening" OR intub* OR ventilat* OR nausea* OR emesis OR aspirat* OR vomit* OR hypoxi* OR bradycard* OR hypotens* OR myoclon* OR laryngospas* OR intraocular OR letharg* OR apne* OR apnoe* OR hallucinat*))) 473 |  |         |          |

\*Same Strategy for Cochrane.

†In-Process & Other Non-Indexed Citations and Ovid MEDLINE(R) 1946 to Present

‡Cochrane =74; Embase 1988 to 2014 week 24.

**Appendix 3.** Cochrane Collaboration's tool for assessment of risk of bias in randomized controlled trials.

| Author/Year       | Adequate Sequence Generation | Allocation concealment | Blinding |               |                     |                 |                   | Incomplete Outcome Data addressed | Free of selective outcome reporting | Free of other bias |
|-------------------|------------------------------|------------------------|----------|---------------|---------------------|-----------------|-------------------|-----------------------------------|-------------------------------------|--------------------|
|                   |                              |                        | Patients | ED Physicians | Follow-up Physician | Data Collectors | Outcome Assessors |                                   |                                     |                    |
| Asadi /2013       | Yes                          | Yes                    | Yes      | Yes           | No                  | Yes             | Yes               | Yes                               | Yes                                 | Yes                |
| Barkan /2013      | Yes                          | Yes                    | Yes      | Yes           | Unclear             | Yes             | Unclear           | No                                | Unclear                             | No                 |
| Di Liddo/2006     | Yes                          | Yes                    | Unclear  | Unclear       | Unclear             | Unclear         | Unclear           | Yes                               | Yes                                 | No                 |
| Dilli 2008        | Yes                          | Yes                    | No       | No            | No                  | Yes             | No                | Yes                               | Yes                                 | No                 |
| Ghane/2012        | No                           | Yes                    | No       | No            | No                  | No              | No                | Yes                               | Yes                                 | No                 |
| Khutia/2012       | Unclear                      | Yes                    | Yes      | Yes           | No                  | Yes             | Yes               | Yes                               | Yes                                 | No                 |
| Klein/2011        | Unclear                      | Unclear                | No       | Yes           | No                  | No              | Yes               | Yes                               | Yes                                 | No                 |
| Kye /2012         | Yes                          | Yes                    | Yes      | Yes           | No                  | Yes             | Unclear           | Yes                               | Yes                                 | No                 |
| Langhan /2011     | Unclear                      | Unclear                | Yes      | No            | No                  | Yes             | Unclear           | Yes                               | Yes                                 | No                 |
| Lee/2012          | Yes                          | Yes                    | No       | Yes           | No                  | No              | No                | Yes                               | Yes                                 | No                 |
| Lee-Jayaram /2010 | Yes                          | Yes                    | Yes      | Yes           | No                  | No              | Yes               | Yes                               | Yes                                 | No                 |
| Luhmann/2006      | Yes                          | Yes                    | No       | No            | NA                  | No              | No                | Yes                               | Yes                                 | No                 |
| Roback/2006       | Yes                          | No                     | No       | No            | No                  | No              | No                | Yes                               | Yes                                 | No                 |
| Shah/2011         | Yes                          | Yes                    | Yes      | Yes           | NA                  | Yes             | Yes               | Yes                               | Yes                                 | No                 |

Abbreviations: ED, Emergency Department

**Appendix 4:** Newcastle-Ottawa Scale (NOS) for assessing the quality of non-randomized studies

|                 |                                | <b>Selection</b>                                  |                                             |                                                                                | <b>Comparability</b>                                    |                                                           |                                             | <b>Outcome</b>                                   |                                               |
|-----------------|--------------------------------|---------------------------------------------------|---------------------------------------------|--------------------------------------------------------------------------------|---------------------------------------------------------|-----------------------------------------------------------|---------------------------------------------|--------------------------------------------------|-----------------------------------------------|
| Author/Year     | Was the cohort representative? | Was the selection of non-exposed cohort adequate? | Was the ascertainment of exposure credible? | Was the outcome of interest demonstrated to not exist in the study enrollment? | Were the cohorts comparable on the basis of the design? | Were the cohorts comparable on the basis of the analysis? | Was the outcome assessed by credible means? | Was follow-up long enough for outcomes to occur? | Was the amount of patients followed adequate? |
| Anderson/2007   | Yes                            | NA                                                | Yes                                         | Yes                                                                            | NA                                                      | NA                                                        | Yes                                         | Yes                                              | Yes                                           |
| Andolfatto/2010 | Yes                            | NA                                                | Yes                                         | Yes                                                                            | NA                                                      | NA                                                        | Yes                                         | Yes                                              | Yes                                           |
| Babl/2010       | Yes                            | NA                                                | Yes                                         | Yes                                                                            | NA                                                      | NA                                                        | Yes                                         | Yes                                              | Yes                                           |
| Babl/2008       | Yes                            | NA                                                | Yes                                         | Yes                                                                            | NA                                                      | NA                                                        | Yes                                         | Yes                                              | Yes                                           |
| Bar-Meir/2006   | Somewhat                       | Yes                                               | Yes                                         | Yes                                                                            | Yes                                                     | Yes                                                       | Yes                                         | Yes                                              | Yes                                           |
| Bleilberg/2007  | Yes                            | NA                                                | Yes                                         | Yes                                                                            | NA                                                      | NA                                                        | Yes                                         | Yes                                              | Yes                                           |
| Chong/2013      | Yes                            | Yes                                               | Yes                                         | Yes                                                                            | Yes                                                     | Yes                                                       | Yes                                         | Yes                                              | Yes                                           |
| Chun/2009       | Somewhat                       | NA                                                | Yes                                         | Yes                                                                            | Yes                                                     | Yes                                                       | Yes                                         | Yes                                              | Yes                                           |
| Cudny/2013      | Yes                            | NA                                                | Yes                                         | Yes                                                                            | Yes                                                     | Yes                                                       | Yes                                         | Yes                                              | Yes                                           |
| Heinrich/2014   | Yes                            | NA                                                | Yes                                         | Yes                                                                            | NA                                                      | NA                                                        | Yes                                         | Yes                                              | Yes                                           |
| Jasiak/2012     | Yes                            | NA                                                | Yes                                         | Yes                                                                            | NA                                                      | NA                                                        | Yes                                         | Yes                                              | Yes                                           |
| Jiminez/2012    | Somewhat                       | NA                                                | Yes                                         | Yes                                                                            | NA                                                      | NA                                                        | Yes                                         | Yes                                              | Yes                                           |
| Koo/2013        | Somewhat                       | NA                                                | Yes                                         | Yes                                                                            | Yes                                                     | Yes                                                       | Yes                                         | Yes                                              | Yes                                           |
| Lane/2008       | Yes                            | NA                                                | Yes                                         | Yes                                                                            | NA                                                      | NA                                                        | Yes                                         | Yes                                              | Yes                                           |
| Lin/2010        | Yes                            | NA                                                | Yes                                         | Yes                                                                            | Yes                                                     | NA                                                        | Yes                                         | Yes                                              | Yes                                           |
| Losek/2006      | Yes                            | NA                                                | Yes                                         | Yes                                                                            | Yes                                                     | NA                                                        | Yes                                         | Yes                                              | Yes                                           |
| Mandt/2012      | Yes                            | NA                                                | Yes                                         | Yes                                                                            | NA                                                      | NA                                                        | Yes                                         | Yes                                              | Yes                                           |

|               |         |     |     |     |     |     |     |     |     |
|---------------|---------|-----|-----|-----|-----|-----|-----|-----|-----|
| McKee/2008    | Yes     | NA  | Yes | Yes | No  | No  | Yes | Yes | Yes |
| McQueen/2009  | Unclear | NA  | Yes |
| Melendez/2009 | Yes     | Yes | Yes | Yes | Yes | Yes | Yes | Yes | Yes |
| Misra/2008    | No      | NA  | Yes | Yes | NA  | NA  | Yes | Yes | Yes |
| Oktay/2005    | Yes     | NA  | Yes | Yes | NA  | NA  | Yes | Yes | Yes |
| Seith/2012    | Yes     | NA  | Yes | Yes | NA  | NA  | Yes | Yes | Yes |
| Sharieff/2007 | Yes     | NA  | Yes | Yes | NA  | NA  | Yes | Yes | Yes |
| Street/2014   | No      | NA  | Yes | Yes | NA  | NA  | Yes | Yes | Yes |
| Treston/2009  | Yes     | NA  | Yes | Yes | NA  | NA  | Yes | Yes | Yes |
| Waterman/2006 | Yes     | NA  | Yes | Yes | Yes | NA  | Yes | Yes | Yes |
| Wells/2012    | Yes     | NA  | Yes | No  | NA  | NA  | Yes | Yes | Yes |
